# Supplementary material for: In situ unraveling of the effect of the dynamic chemical state on selective CO2 reduction upon zinc electrocatalysts
Source: Royal Society of Chemistry journal article supplement (doi:10.1039/d0nr03475d), 2020-01-01
Supplement: d0nr03475d1.pdf [file d0nr03475d1.pdf]

## Supporting Information

### ***In situ* unraveling effect of dynamic chemical state on selective CO<sub>2</sub> reduction upon zinc electrocatalyst**

Tai-Lung Chen,<sup>‡a</sup> Hsiao-Chien Chen,<sup>‡a,b</sup> Yen-Po Huang,<sup>a</sup> Sheng-Chih Lin,<sup>a</sup> Cheng-Hung Hou,<sup>c</sup> Hui-Ying Tan,<sup>a</sup> Ching-Wei Tung,<sup>a</sup> Ting-Shan Chan,<sup>\*d</sup> Jing-Jong Shyue,<sup>c,e</sup> and Hao Ming Chen<sup>\*a,d</sup>

<sup>a</sup>*Department of Chemistry, National Taiwan University, Taipei 10617, Taiwan, E-mail: [haomingchen@ntu.edu.tw](mailto:haomingchen@ntu.edu.tw)*

<sup>b</sup>*Department of Photonics, National Cheng Kung University, Tainan 70101, Taiwan*

<sup>c</sup>*Research Center for Applied Sciences, Academia Sinica, Taipei 11529, Taiwan*

<sup>d</sup>*National Synchrotron Radiation Center, Hsinchu 30076, Taiwan*

<sup>e</sup>*Department of Materials Science and Engineering, National Taiwan University, Taipei 10617, Taiwan*

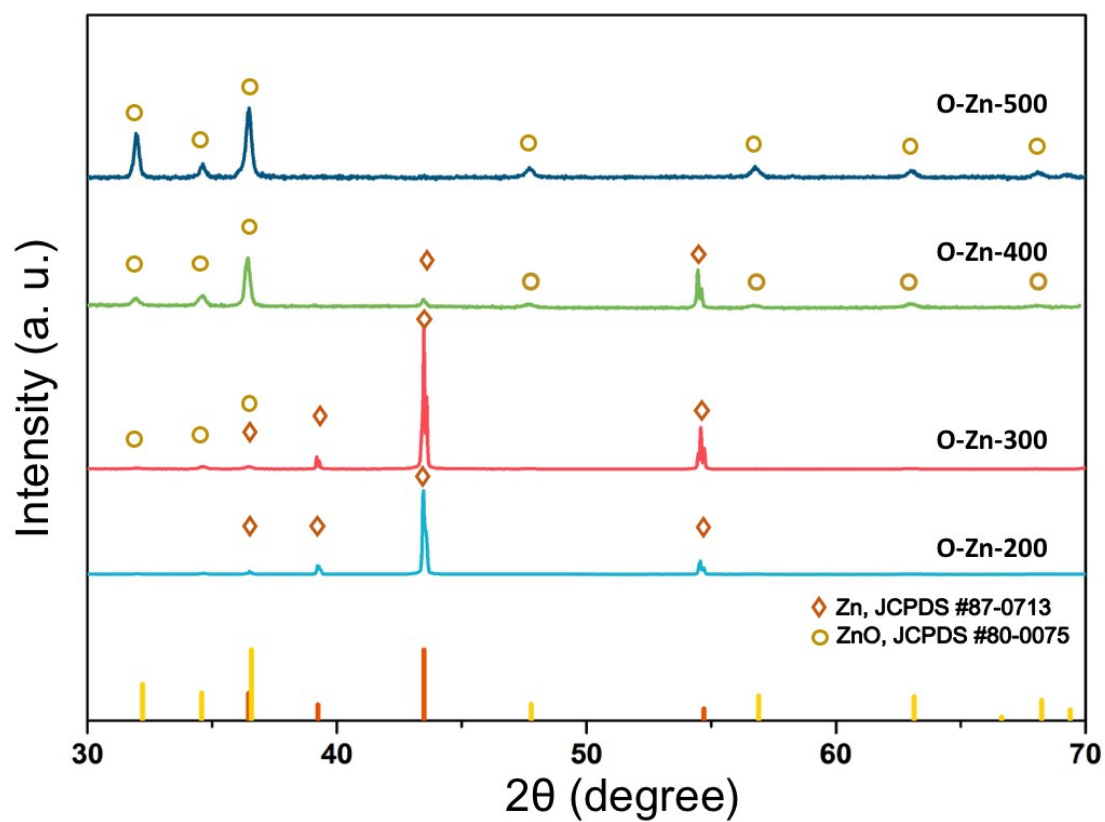

Fig. S1 X-ray diffraction patterns of O-Zn-200, O-Zn-300, O-Zn-400 and O-Zn-500.

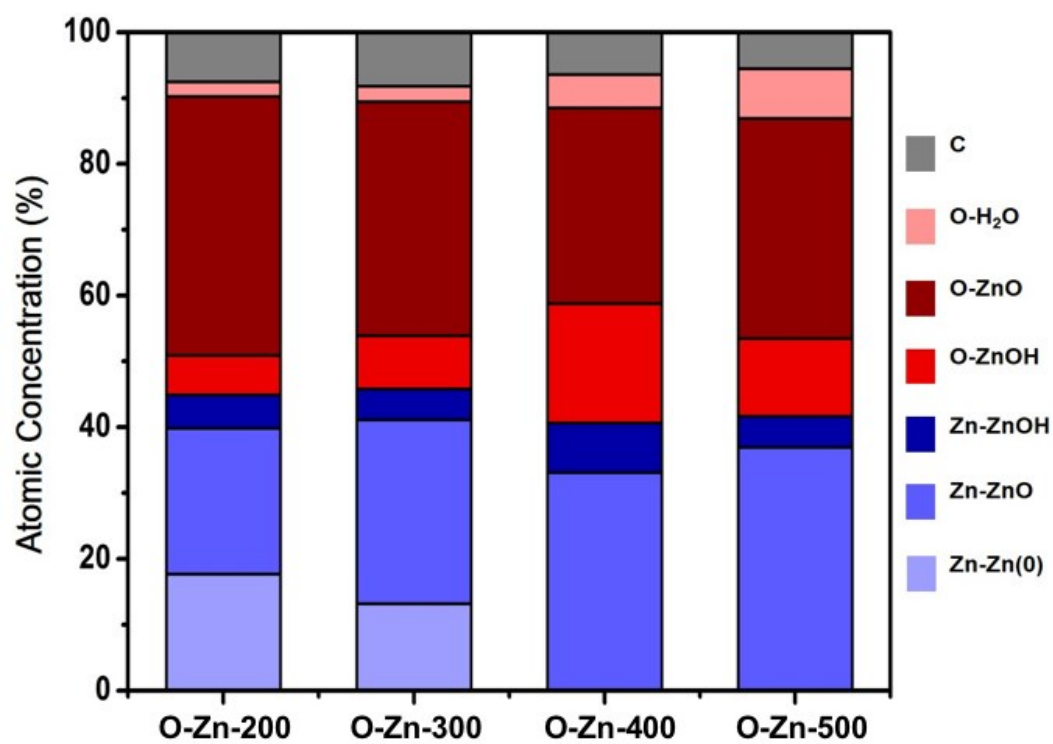

**Fig. S2** XPS quantitation analysis atomic ratio of all species contained in O-Zn-200, O-Zn-300, O-Zn-400 and O-Zn-500.

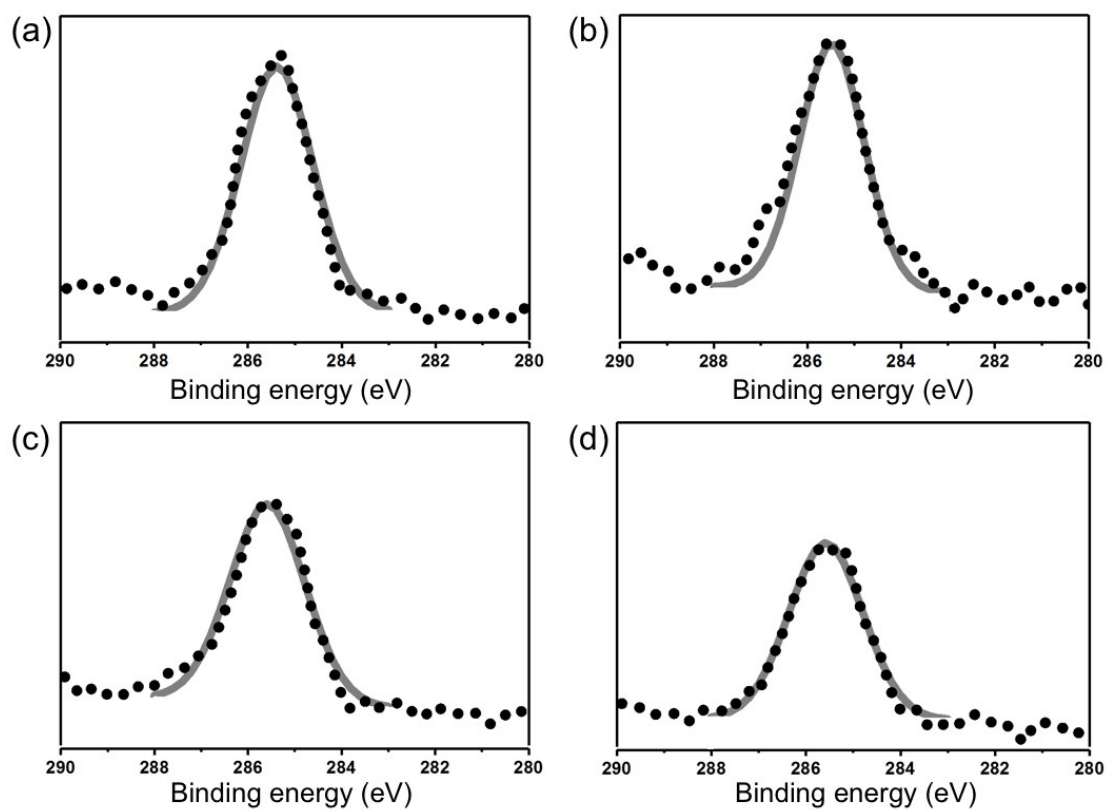

**Fig. S3** XPS spectra of C 1s of (a) O-Zn-200, (b) O-Zn-300, (c) O-Zn-400 and (d) O-Zn-500.

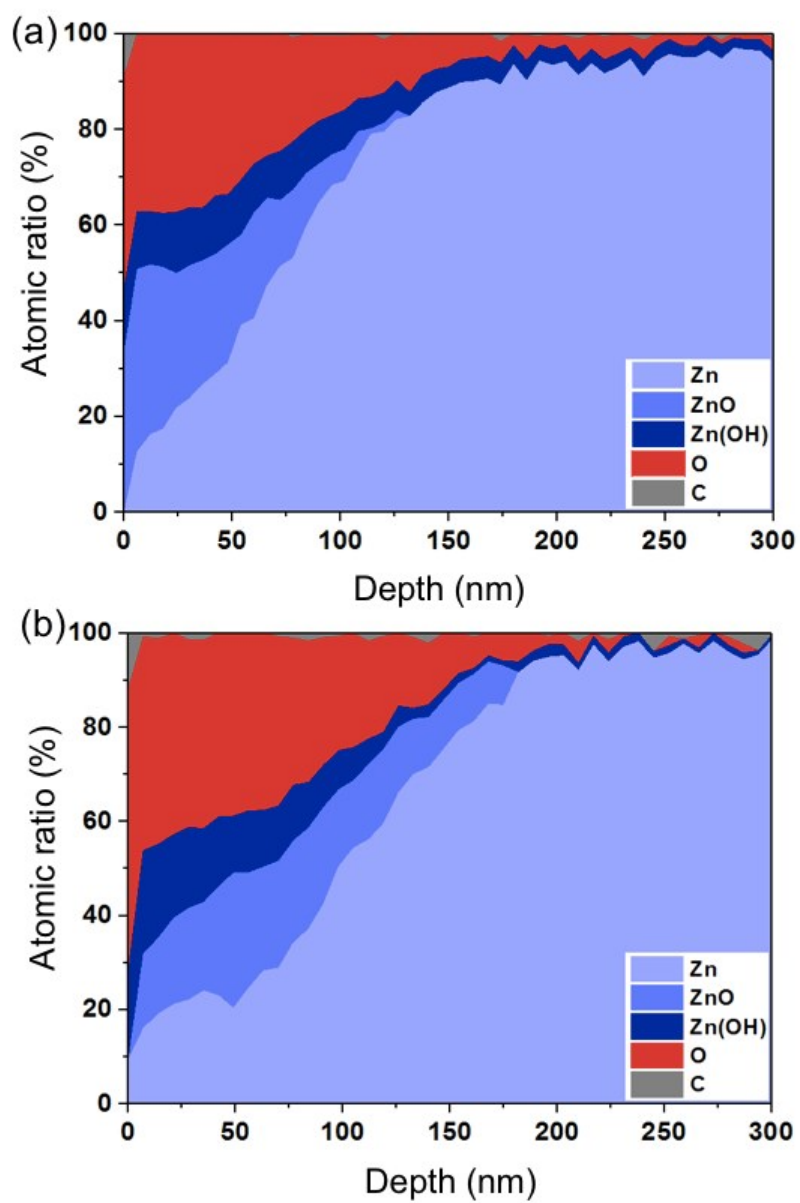

**Fig. S4** Depth-profiling XPS of (a) O-Zn-200 and (b) O-Zn-400.

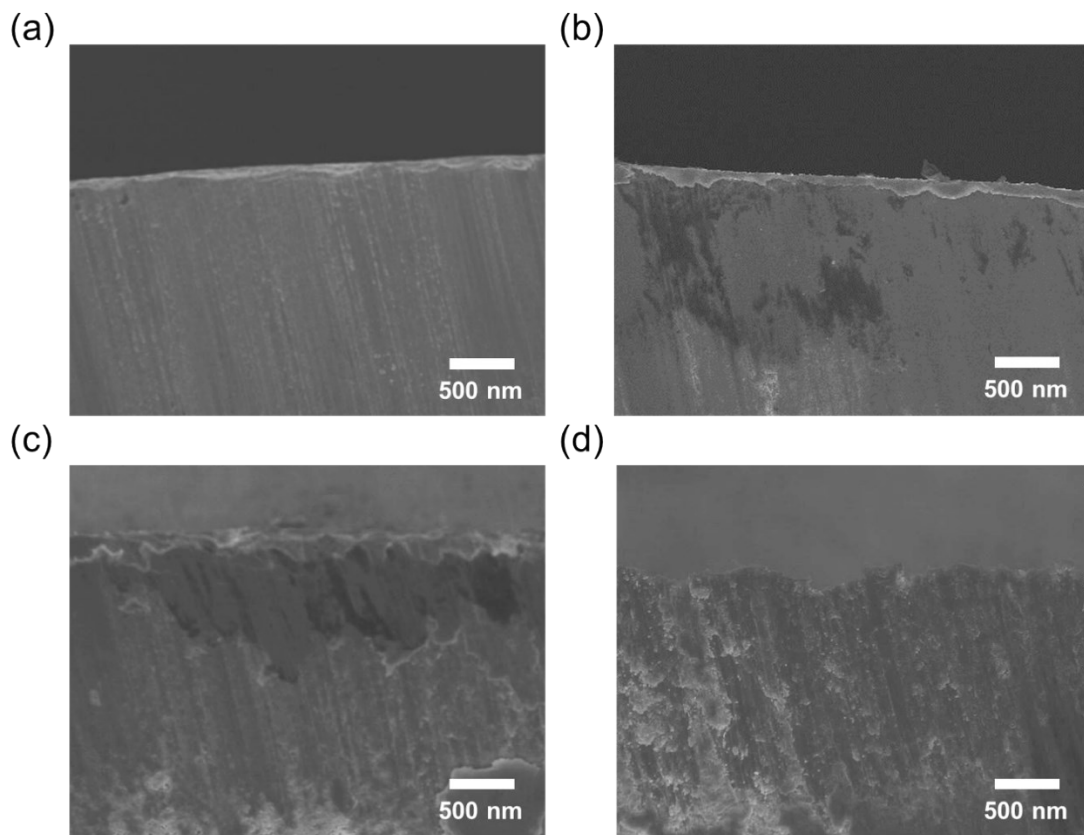

**Fig. S5** Cross-section SEM images of (a) O-Zn-200, (b) O-Zn-300, (c) O-Zn-400 and (d) O-Zn-500.

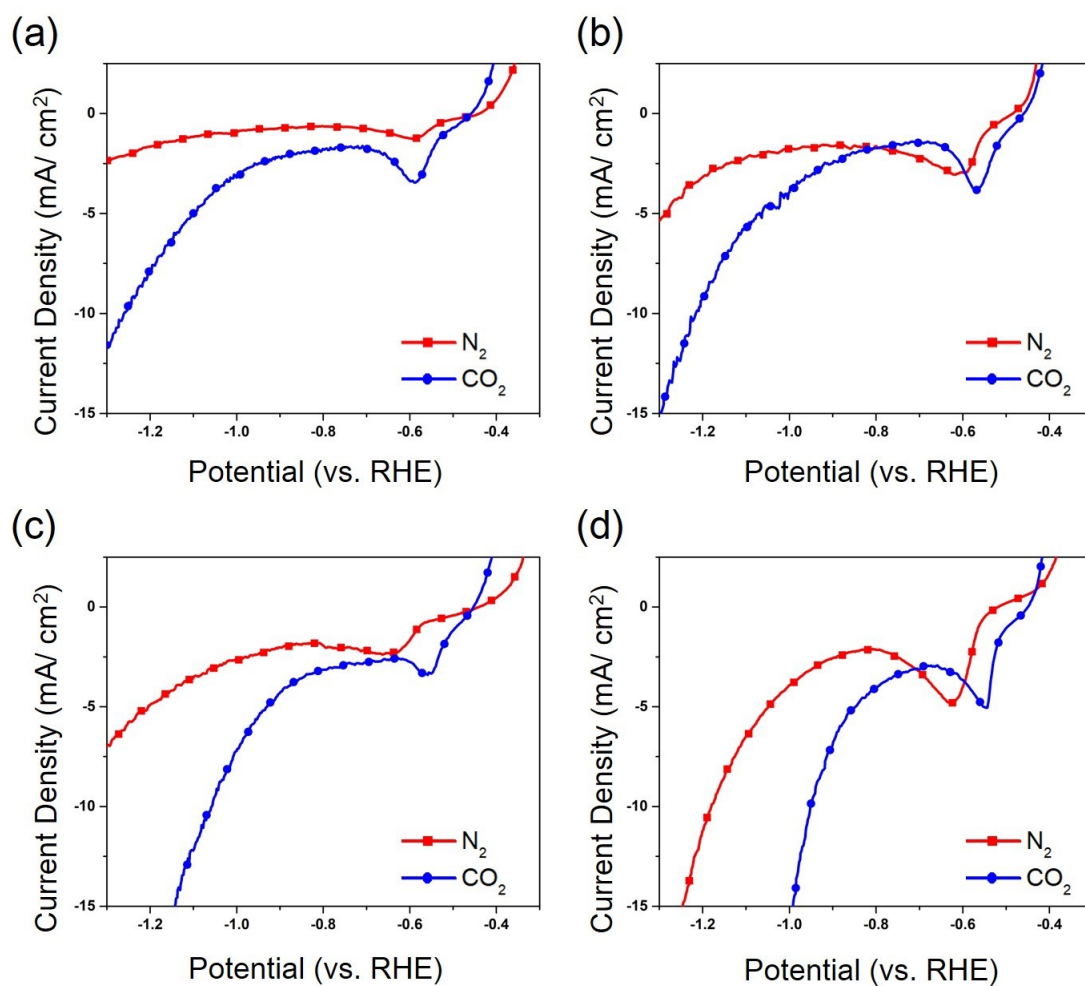

**Fig. S6** CO<sub>2</sub>RR performance analysis. LSV measurements under in 0.1M KHCO<sub>3</sub> with saturated CO<sub>2</sub> or N<sub>2</sub> of (a) O-Zn-200, (b) O-Zn-300, (c) O-Zn-400 and (d) O-Zn-500.

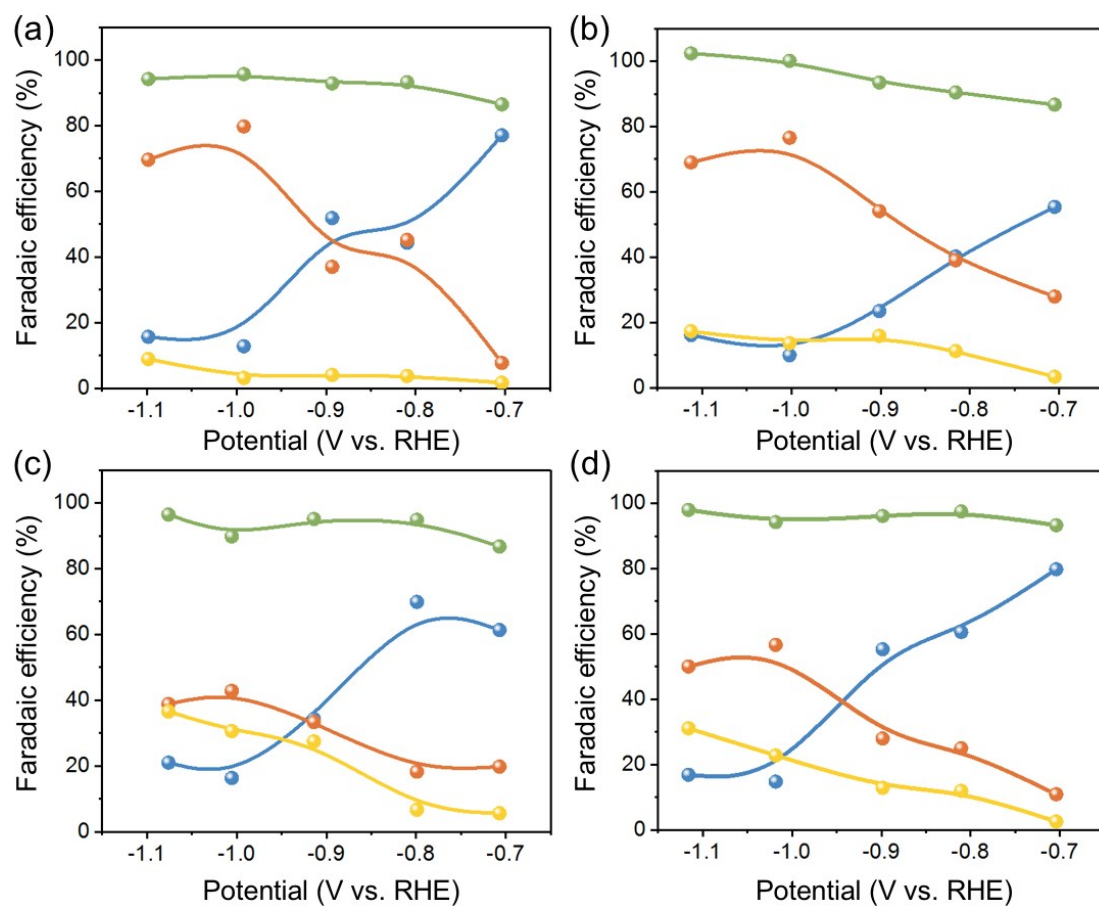

**Fig. S7** Faradaic efficiency performance at a selected potential window between  $-0.70$  to  $-1.10$  V (vs. RHE) of (a) O-Zn-200, (b) O-Zn-300, (c) O-Zn-400 and (d) O-Zn-500. Faradaic efficiency of CO (orange), formate (yellow), H<sub>2</sub> (blue) and total faradaic efficiency (green) of each samples were shown in the figure.



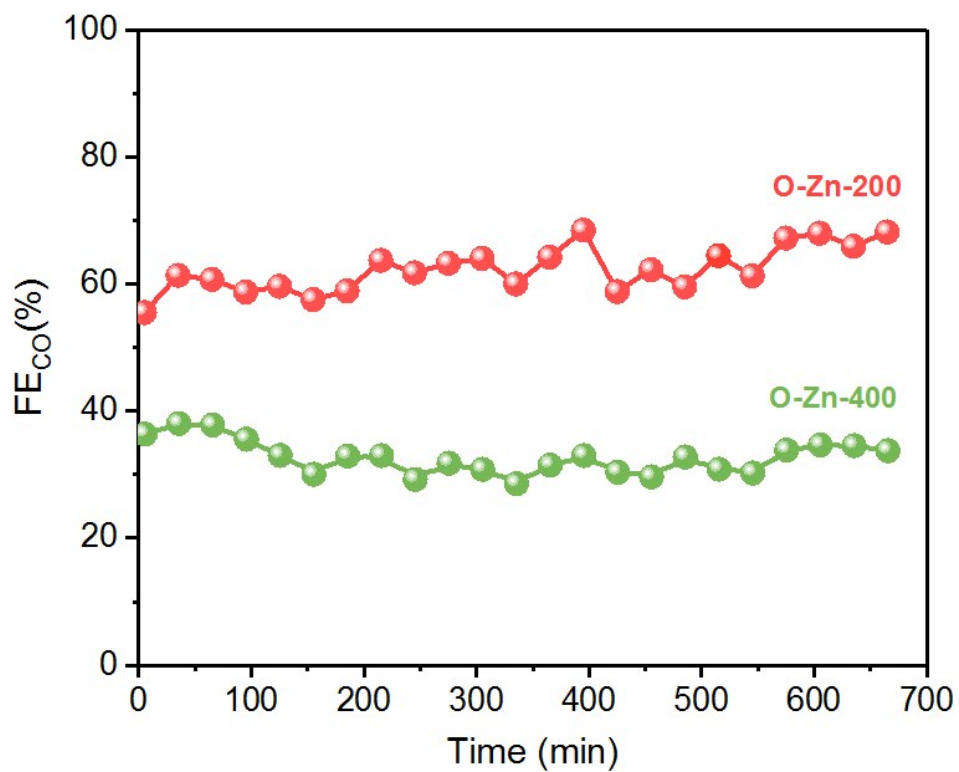

**Fig. S8** The stability of O-Zn-200 and O-Zn-400 at cathodic potential of -1.0 V during CO<sub>2</sub>RR.
